# Supplementary material
Source: publisher site journal article supplement (https://www.dovepress.com/get_supplementary_file.php?f=415373.xlsx)
Supplement: Supplementary file 1 [file get_supplementary_file.php]

## Sheet: supplementary table1
Supplementary Table1 | Virulence genes of ESBL-producing Escherichia coli Isolates
Isolate	Virulence genes
EC108	acrB	allB	aslA	chuA	chuS	chuT	chuU	chuV	chuW	chuX	chuY	csgB	entB	entC	entD	entE	entF	entS	fdeC	fepA	fepB	fepC	fepD	fepG	fes	fimA	fimB	fimC	fimD	fimE	fimF	fimG	fimH	fimI	fyuA	gspC	gspD	gspE	gspF	gspG	gspH	gspI	gspJ	gspK	gspL	gspM	irp1	irp2	iucA
EC117	acrB	allB	aslA	chuA	chuS	chuT	chuU	chuV	chuW	chuX	chuY	csgB	entB	entC	entD	entE	entF	entS	fdeC	fepA	fepB	fepC	fepD	fepG	fes	fimA	fimC	fimD	fimE	fimF	fimG	fimH	fimI	fyuA	gspC	gspD	gspE	gspF	gspG	gspH	gspI	gspJ	gspK	gspL	gspM	irp1	irp2	iucA	iucB
EC139	acrA	acrB	allB	aslA	chuS	chuU	chuW	chuY	csgB	entB	entC	entD	entE	entF	entS	espL1	espL4	espR1	espR4	espX1	espX4	espX5	espY1	espY2	espY3	espY4	fdeC	fepA	fepB	fepC	fepD	fepG	fes	fimA	fimB	fimC	fimD	fimE	fimF	fimG	fimH	fimI	fyuA	gnd	gspC	gspD	gspE	gspF	gspG
EC170	acrB	allB	aslA	chuA	chuS	chuT	chuU	chuV	chuW	chuX	chuY	csgB	entB	entC	entD	entE	entF	entS	fdeC	fepA	fepB	fepC	fepD	fepG	fes	fimA	fimB	fimC	fimD	fimE	fimF	fimG	fimH	fimI	fyuA	gspC	gspD	gspE	gspF	gspG	gspH	gspI	gspJ	gspK	gspL	gspM	irp2	iucA	iucB
EC193	acrA	acrB	allB	astA	cpsACP	csgB	entB	entC	entD	entE	entF	entS	espL1	espX1	espX4	espX5	fdeC	fepA	fepB	fepC	fepD	fepG	fes	fimF	fimG	fimH	galF	gnd	gspC	gspD	gspE	gspF	gspG	gspH	gspI	gspJ	gspK	gspL	gspM	iroB	iroC	iroD	iroE	iroN	manB	manC	ompA	rcsB	ugd
EC237	acrB	allB	aslA	chuA	chuS	chuT	chuU	chuV	chuW	chuX	chuY	cnf1	csgB	entB	entC	entD	entE	entF	entS	fdeC	fepA	fepB	fepC	fepD	fepG	fes	fimA	fimB	fimC	fimD	fimE	fimF	fimG	fimH	fimI	fyuA	gspC	gspD	gspE	gspF	gspG	gspH	gspI	gspJ	gspK	gspL	gspM	hlyA	hlyB
EC247	acrB	afaA	afaB-I	afaE-V	allB	aslA	chuA	chuS	chuT	chuU	chuV	chuW	chuX	chuY	csgB	daaC	daaF	draD	draP	entB	entC	entD	entE	entF	entS	fdeC	fepA	fepB	fepC	fepD	fepG	fes	fimA	fimB	fimC	fimD	fimE	fimF	fimG	fimH	fimI	fyuA	gspC	gspD	gspE	gspF	gspG	gspH	gspI
EC262	acrA	acrB	allB	aslA	chuW	csgB	entB	entC	entD	entE	entF	entS	espL1	espL4	espR1	espR3	espX1	espX2	espX4	espX5	espX6	espY1	espY2	espY3	fdeC	fepA	fepB	fepC	fepD	fepG	fes	fimA	fimB	fimC	fimD	fimE	fimF	fimG	fimH	fimI	gnd	gspC	gspD	gspE	gspF	gspG	gspH	gspI	gspJ
EC266	acrB	allB	aslA	chuA	chuS	chuT	chuU	chuV	chuW	chuX	chuY	csgB	entB	entC	entD	entE	entF	entS	fdeC	fepA	fepB	fepC	fepD	fepG	fes	fimA	fimC	fimD	fimE	fimF	fimG	fimH	fimI	fyuA	gspC	gspD	gspE	gspF	gspG	gspH	gspI	gspJ	gspK	gspL	gspM	irp1	irp2	iucA	iucB
EC322	acrA	acrB	allB	aslA	chuS	chuU	chuW	chuY	csgB	entB	entC	entD	entE	entF	entS	espL1	espL4	espR1	espR4	espX1	espX4	espX5	espY1	espY2	espY3	espY4	fdeC	fepA	fepB	fepC	fepD	fepG	fes	fimA	fimB	fimC	fimD	fimE	fimF	fimG	fimH	fimI	fyuA	galF	gnd	gspL	gspM	irp1	irp2
EC333	acrB	afaA	afaB-I	afaD	allB	aslA	chuA	chuS	chuT	chuU	chuV	chuW	chuX	chuY	csgB	daaC	daaF	draP	entB	entC	entD	entE	entF	entS	fdeC	fepA	fepB	fepC	fepD	fepG	fes	fimA	fimB	fimC	fimD	fimE	fimF	fimG	fimH	fimI	fyuA	gspC	gspD	gspE	gspF	gspG	gspH	gspI	gspJ
EC349	acrB	allB	csgB	entB	entC	entD	entE	entF	entS	espL1	espR1	espX1	espX4	espX5	fdeC	fepA	fepB	fepC	fepD	fepG	fes	fimA	fimB	fimC	fimD	fimE	fimF	fimG	fimH	fimI	fyuA	gnd	gspC	gspD	gspE	gspF	gspG	gspH	gspI	gspJ	gspK	gspL	gspM	iroB	iroC	iroD	iroE	iroN	irp1
EC352	acrB	allB	csgB	entB	entC	entD	entE	entF	entS	espL1	espR1	espX1	espX4	espX5	fdeC	fepA	fepB	fepC	fepD	fepG	fes	fimA	fimB	fimC	fimD	fimE	fimF	fimG	fimH	fimI	gnd	gspC	gspD	gspE	gspF	gspG	gspH	gspI	gspJ	gspK	gspL	gspM	iroB	iroC	iroD	iroE	iroN	iucA	iucB
EC353	aap/aspU	acrB	allB	aslA	astA	chuA	chuS	chuT	chuU	chuV	chuW	chuX	chuY	csgB	entB	entC	entD	entE	entF	entS	fdeC	fepA	fepB	fepC	fepD	fepG	fes	fimA	fimB	fimC	fimD	fimE	fimF	fimG	fimH	fimI	fyuA	gspC	gspD	gspE	gspF	gspG	gspH	gspI	gspJ	gspK	gspL	gspM	irp1
EC376	acrB	afaA	afaB-I	afaD	afaE-I	allB	aslA	chuA	chuS	chuT	chuU	chuV	chuW	chuX	chuY	csgB	daaC	daaF	draP	entB	entC	entD	entE	entF	entS	fdeC	fepA	fepB	fepC	fepD	fepG	fes	fimA	fimB	fimC	fimD	fimE	fimF	fimG	fimH	fimI	fyuA	gspC	gspD	gspE	gspF	gspG	gspH	gspI
EC391	acrA	acrB	allB	aslA	chuS	chuU	chuW	chuY	csgB	entB	entC	entD	entE	entF	entS	espL1	espL4	espR1	espX1	espX4	espX5	espY1	espY2	espY3	espY4	fdeC	fepA	fepB	fepC	fepD	fepG	fes	fimA	fimB	fimC	fimD	fimE	fimF	fimG	fimH	fimI	fyuA	gspC	gspD	gspE	gspF	gspG	gspH	gspI
EC402	acrB	allB	aslA	chuA	chuS	chuT	chuU	chuV	chuW	chuX	chuY	csgB	entB	entC	entD	entE	entF	entS	fdeC	fepA	fepB	fepC	fepD	fepG	fes	fimA	fimC	fimD	fimE	fimF	fimG	fimH	fimI	fyuA	gspC	gspD	gspE	gspF	gspG	gspH	gspI	gspJ	gspK	gspL	gspM	irp1	irp2	iucA	iucB
EC416	acrB	allB	aslA	chuA	chuS	chuT	chuU	chuV	chuW	chuX	chuY	clbA	clbB	clbC	clbD	clbE	clbF	clbG	clbH	clbI	clbJ	clbK	clbL	clbM	clbN	clbO	clbP	clbQ	clbS	cnf1	csgB	entB	entC	entD	entE	entF	entS	fdeC	fepA	fepB	fepC	fepD	fepG	fes	fimA	fimB	fimC	fimD	fimE
EC457	acrB	allB	aslA	chuA	chuS	chuT	chuU	chuV	chuW	chuX	chuY	clbA	clbB	clbC	clbD	clbE	clbF	clbG	clbH	clbI	clbJ	clbK	clbL	clbM	clbN	clbO	clbP	clbQ	clbS	cnf1	csgB	entB	entC	entD	entE	entF	entS	fdeC	fepA	fepB	fepC	fepD	fepG	fes	fimA	fimB	fimC	fimD	fimE
EC488	acrA	acrB	allB	aslA	chuA	chuS	chuT	chuU	chuW	chuY	csgB	csgG	entB	entC	entD	entE	entF	entS	espL1	espR1	espR4	espX1	espX4	espY1	espY2	fdeC	fepA	fepB	fepC	fepD	fepG	fes	fimA	fimB	fimC	fimD	fimE	fimF	fimG	fimH	fimI	fyuA	gnd	gspC	gspD	gspE	gspF	gspG	gspH
EC501	acrB	afaA	afaB-I	afaD	allB	aslA	chuA	chuS	chuT	chuU	chuV	chuW	chuX	chuY	csgB	daaC	daaF	draP	entB	entC	entD	entE	entF	entS	fdeC	fepA	fepB	fepC	fepD	fepG	fes	fimA	fimB	fimC	fimD	fimE	fimF	fimG	fimH	fimI	fyuA	gnd	gspL	gspM	irp1	irp2	iucA	iucB	iucC
EC506	acrA	acrB	allB	cpsACP	csgB	entB	entC	entD	entE	entF	entS	espL1	espR1	espX1	espX4	espX5	fdeC	fepA	fepB	fepC	fepD	fepG	fes	fimA	fimC	fimD	fimE	fimF	fimG	fimH	fimI	galF	gnd	manB	manC	ompA	rcsB	ugd	wzi	yagW/ecpD	yagX/ecpC	yagY/ecpB	yagZ/ecpA	ykgK/ecpR
EC537	acrB	allB	aslA	chuA	chuS	chuT	chuU	chuV	chuW	chuX	chuY	clbA	clbB	clbC	clbD	clbE	clbF	clbG	clbH	clbI	clbJ	clbL	clbM	clbN	clbO	clbP	clbQ	clbS	cnf1	csgB	entB	entC	entD	entE	entF	entS	fdeC	fepA	fepB	fepC	fepD	fepG	fes	fimA	fimB	fimC	fimD	fimE	fimF
EC563	acrB	allB	aslA	chuA	chuS	chuT	chuU	chuV	chuW	chuX	chuY	csgB	entB	entC	entD	entE	entF	entS	fdeC	fepA	fepB	fepC	fepD	fepG	fes	fimA	fimC	fimD	fimE	fimF	fimG	fimH	fimI	fyuA	gspC	gspD	gspE	gspF	gspG	gspH	gspI	gspJ	gspK	gspL	gspM	irp1	irp2	iucA	iucB
EC576	acrA	acrB	allB	aslA	chuA	chuS	chuU	chuW	chuY	csgB	csgG	entB	entC	entD	entE	entF	entS	espL1	espL4	espR1	espR4	espX1	espX4	espX5	espY1	espY2	espY3	fdeC	fepA	fepB	fepC	fepD	fepG	fes	fimA	fimB	fimC	fimD	fimE	fimF	fimG	fimH	fimI	fyuA	gnd	gtrA	irp1	irp2	iucA
EC586	acrA	acrB	allB	aslA	cpsACP	csgB	entB	entC	entD	entE	entF	entS	espL1	espL4	espR1	espR4	espX1	espX4	espX5	espY1	fdeC	fepA	fepB	fepC	fepD	fepG	fes	fimA	fimB	fimC	fimD	fimE	fimF	fimG	fimH	fimI	galF	gnd	ompA	rcsB	ugd	wzi	yagW/ecpD	yagX/ecpC	yagY/ecpB	yagZ/ecpA	ykgK/ecpR
EC593	acrB	afaA	afaB-I	afaE-V	allB	aslA	chuA	chuS	chuT	chuU	chuV	chuW	chuX	chuY	csgB	daaC	daaF	draD	draP	entB	entC	entD	entE	entF	entS	fdeC	fepA	fepB	fepC	fepD	fepG	fes	fimA	fimB	fimC	fimD	fimE	fimF	fimG	fimH	fimI	fyuA	gspC	gspD	gspE	gspF	gspG	gspH	gspI
EC622	acrB	allB	aslA	chuA	chuS	chuT	chuU	chuV	chuW	chuX	chuY	csgB	entB	entC	entD	entE	entF	entS	fdeC	fepA	fepB	fepC	fepD	fepG	fes	fimA	fimC	fimD	fimE	fimF	fimG	fimH	fimI	fyuA	gspC	gspD	gspE	gspF	gspG	gspH	gspI	gspJ	gspK	gspL	gspM	irp1	irp2	iucA	iucB
EC635	acrA	acrB	allB	aslA	csgB	entB	entC	entD	entE	entF	entS	espL1	espL4	espR1	espR3	espR4	espX1	espX4	espX5	espY1	fdeC	fepA	fepB	fepC	fepD	fepG	fes	fimA	fimB	fimC	fimD	fimE	fimF	fimG	fimH	fimI	gnd	ompA	yagW/ecpD	yagX/ecpC	yagY/ecpB	yagZ/ecpA	ykgK/ecpR
EC644	acrA	acrB	allB	aslA	csgB	entB	entC	entD	entE	entF	entS	espL1	espL4	espR1	espX1	espX4	espX5	espY1	fdeC	fepA	fepB	fepC	fepD	fepG	fes	fimA	fimB	fimC	fimD	fimE	fimF	fimG	fimH	fimI	galF	gnd	gspC	gspD	gspE	gspF	gspG	gspH	gspI	gspJ	gspK	gspL	gspM	manB	manC
EC649	acrB	allB	aslA	chuA	chuS	chuT	chuU	chuV	chuW	chuX	chuY	csgB	entB	entC	entD	entE	entF	entS	fdeC	fepA	fepB	fepC	fepD	fepG	fes	fimA	fimB	fimC	fimD	fimE	fimF	fimG	fimH	fimI	fyuA	gspC	gspD	gspE	gspF	gspG	gspH	gspI	gspJ	gspK	gspL	gspM	irp1	irp2	iucA
EC650	acrB	allB	aslA	chuA	chuS	chuT	chuU	chuV	chuW	chuX	chuY	csgB	entB	entC	entD	entE	entF	entS	fdeC	fepA	fepB	fepC	fepD	fepG	fes	fimA	fimB	fimC	fimD	fimE	fimF	fimG	fimH	fimI	fyuA	gspC	gspD	gspE	gspF	gspG	gspH	gspI	gspJ	gspK	gspL	gspM	irp1	irp2	iucA
EC663	acrB	allB	csgB	entB	entC	entD	entE	entF	entS	espL1	espR1	espX1	espX4	espX5	fdeC	fepA	fepB	fepC	fepD	fepG	fes	fimA	fimB	fimC	fimD	fimE	fimF	fimG	fimH	fimI	gnd	gspC	gspD	gspE	gspF	gspG	gspH	gspI	gspJ	gspK	gspL	gspM	iroB	iroC	iroD	iroE	iroN	iucA	iucB
EC664	acrB	allB	aslA	chuA	chuS	chuT	chuU	chuV	chuW	chuX	chuY	csgB	entB	entC	entD	entE	entF	entS	fdeC	fepA	fepB	fepC	fepD	fepG	fes	fimA	fimB	fimC	fimD	fimE	fimF	fimG	fimH	fimI	fyuA	irp1	irp2	ompA	rcsB	yagW/ecpD	yagX/ecpC	yagY/ecpB	yagZ/ecpA	ybtA	ybtE	ybtP	ybtQ	ybtS	ybtT
EC714	acrB	allB	aslA	chuA	chuS	chuT	chuU	chuV	chuW	chuX	chuY	csgB	entB	entC	entD	entE	entF	entS	fdeC	fepA	fepB	fepC	fepD	fepG	fes	fimA	fimB	fimC	fimD	fimE	fimF	fimG	fimH	fimI	fyuA	gspC	gspD	gspE	gspF	gspG	gspH	gspI	gspJ	gspK	gspL	gspM	irp1	irp2	kpsD
EC717	acrB	allB	aslA	chuA	chuS	chuT	chuU	chuV	chuW	chuX	chuY	clbA	clbB	clbC	clbD	clbE	clbF	clbG	clbH	clbI	clbJ	clbL	clbM	clbN	clbO	clbP	clbQ	clbS	cnf1	csgB	entB	entC	entD	entE	entF	entS	fdeC	fepA	fepB	fepC	fepD	fepG	fes	fimA	fimB	fimC	fimD	fimE	fimF
[truncated: 71 more columns]

## Sheet: supplementary table2
Supplementary Table2 | Plasmid replicons of ESBL-producing Escherichia coli Isolates
Isolate	NUM_FOUND	Col(BS512)_1	Col(KPHS6)_1	Col(MG828)_1	Col(MP18)_1	Col156_1	Col440II_1	Col440I_1	Col8282_1	ColE10_1	ColRNAI_1	ColpVC_1	IncB/O/K/Z_1	IncB/O/K/Z_2	IncFIA_1	IncFIB(AP001918)_1	IncFIB(K)_1_Kpn3	IncFIB(pHCM2)_1_pHCM2	IncFIC(FII)_1	IncFII(29)_1_pUTI89	IncFII(pHN7A8)_1_pHN7A8	IncFII(pRSB107)_1_pRSB107	IncFII(pSE11)_1_pSE11	IncFII_1	IncHI2A_1	IncHI2_1	IncI1_1_Alpha	IncI2_1_Delta	IncI_Gamma_1	IncN_1	IncQ2_1	IncX4_2	IncY_1	RepA_1_pKPC-CAV1321
EC108	9	100	.	98.47;98.47;100.00;100.00	100	92.21;100.00;100.00	.	.	97.58	.	100	.	100	.	100	100	.	.	.	.	.	.	.	.	.	.	.	.	.	.	.	.	.	.
EC117	6	.	.	84.35;83.59	.	92.21;100.00	.	.	.	.	.	.	100	.	100	100	.	.	.	.	.	100	.	.	.	.	.	.	.	.	.	.	.	.
EC139	10	100	.	.	100	100.00;98.05	.	.	.	.	98.46	100	.	.	.	.	.	100	.	.	.	.	.	.	.	.	97.18	.	.	.	98.89	100	100	.
EC170	7	100	100	.	.	100	.	.	.	.	93.08;93.08;90.77	.	.	96.25	100	100	.	.	.	.	.	.	.	.	.	.	.	.	.	.	.	.	.	.
EC193	3	.	.	.	.	.	.	.	.	.	.	.	.	.	.	100	.	.	.	.	.	.	.	.	.	.	.	100	97.16	.	.	.	.	.
EC237	3	.	.	.	.	92.21	.	.	.	.	.	.	.	.	.	100	.	.	.	100	.	.	.	.	.	.	.	.	.	.	.	.	.	.
EC247	5	.	.	.	.	92.21	.	.	.	.	.	.	.	.	100	100	.	.	.	.	.	100.00;100.00	.	.	.	.	100	.	.	.	.	.	.	.
EC262	2	.	.	.	.	.	.	.	.	.	.	.	.	.	.	.	.	.	.	100	.	.	.	.	.	.	100	.	.	.	.	.	.	.
EC266	5	.	.	100	.	92.21	.	.	99.03	.	.	.	.	.	100	.	.	100	.	.	.	.	.	.	.	.	.	.	.	.	.	.	.	.
EC322	5	100	100	98.47	.	100	.	.	.	.	100.00;95.38;100.00	.	.	.	.	.	.	.	.	.	.	.	.	.	.	.	.	.	.	.	.	.	.	.
EC333	5	.	.	.	.	92.21	.	.	.	.	100.00;95.38;86.15	.	.	.	.	100	.	.	.	100	100	.	.	.	.	.	.	.	.	.	.	.	.	.
EC349	6	.	.	100	.	.	.	.	.	.	.	.	.	.	.	100	.	.	99.8	.	.	.	.	.	100	100	.	.	.	.	.	.	.	99.66
EC352	3	.	.	.	.	.	.	.	.	.	98.46	.	.	.	.	100	.	.	99.6	.	.	.	.	.	.	.	.	.	.	.	.	.	.	.
EC353	4	.	.	.	.	92.21	.	.	.	.	.	.	.	.	.	100	.	.	100	.	.	.	.	100	.	.	.	.	.	.	.	.	.	.
EC376	4	.	.	.	.	92.21	.	.	.	.	.	.	.	.	.	100	.	100	.	100	.	.	.	.	.	.	.	.	.	.	.	.	.	.
EC391	1	.	.	.	.	.	.	.	.	.	.	.	.	.	.	100	.	.	.	.	.	.	.	.	.	.	.	.	.	.	.	.	.	.
EC402	5	.	.	100	.	92.21	.	.	99.03	.	.	.	.	.	100	.	.	100	.	.	.	.	.	.	.	.	.	.	.	.	.	.	.	.
EC416	4	.	.	.	.	.	.	.	.	.	.	.	100	.	.	100	.	.	99.6	.	.	.	100	.	.	.	.	.	.	.	.	.	.	.
EC457	1	.	.	.	.	.	.	.	.	.	.	.	.	.	.	.	.	.	.	.	.	.	.	100	.	.	.	.	.	.	.	.	.	.
EC488	8	.	.	100	.	100	.	.	.	.	98.46	.	.	.	100	100	.	.	.	.	.	100	.	100	.	.	100	.	.	.	.	.	.	.
EC501	3	.	.	.	.	.	.	.	.	.	.	.	100	.	.	100	.	.	.	.	.	.	.	100	.	.	.	.	.	.	.	.	.	.
EC506	1	.	.	.	.	.	.	100	.	.	.	.	.	.	.	.	.	.	.	.	.	.	.	.	.	.	.	.	.	.	.	.	.	.
EC537	2	.	.	.	.	.	99.29	.	.	.	100.00;100.00	.	.	.	.	.	.	.	.	.	.	.	.	.	.	.	.	.	.	.	.	.	.	.
EC563	7	.	.	100	.	92.21;100.00	.	.	97.58	.	.	.	.	.	100	100	.	100	.	.	.	100	.	.	.	.	.	.	.	.	.	.	.	.
EC576	3	.	.	.	.	92.21	.	.	.	.	.	.	.	.	.	100	.	.	99.6	.	.	.	.	.	.	.	.	.	.	.	.	.	.	.
EC586	0	.	.	.	.	.	.	.	.	.	.	.	.	.	.	.	.	.	.	.	.	.	.	.	.	.	.	.	.	.	.	.	.	.
EC593	6	.	.	.	.	92.21	.	.	.	.	.	.	.	.	100	100	.	.	.	.	.	100	.	99.23	.	.	100	.	.	.	.	.	.	.
EC622	5	.	.	99.62	.	92.21	.	.	99.03	.	.	.	.	.	100	.	.	100	.	.	.	.	.	.	.	.	.	.	.	.	.	.	.	.
EC635	3	.	.	.	.	100	.	.	.	.	.	.	.	.	.	.	.	.	.	.	.	.	.	100	.	.	.	.	.	100	.	.	.	.
EC644	5	.	.	100	.	.	.	96.49;97.37;100.00	.	.	.	.	.	.	98.97	100	.	.	90.18	.	.	.	.	.	.	.	.	.	.	.	.	.	.	.
EC649	4	100	.	.	.	100	.	.	.	.	.	.	.	.	100	100	.	.	.	.	.	.	.	.	.	.	.	.	.	.	.	.	.	.
EC650	5	100	.	100	.	92.21;100.00	.	.	.	.	.	.	.	.	100	100	.	.	.	.	.	.	.	.	.	.	.	.	.	.	.	.	.	.
EC663	8	.	.	99.24	.	100	.	.	.	100	.	.	.	.	93.56	100	.	.	99.6	.	100	.	.	.	.	.	100	.	.	.	.	.	.	.
EC664	7	.	100	99.24	.	100	.	.	.	.	.	.	.	.	.	100	100	.	.	100	.	.	.	100	.	.	.	.	.	.	.	.	.	.
EC714	5	100	.	.	.	92.21	.	.	.	.	.	.	.	.	100	100	.	.	.	.	.	.	.	.	.	.	100	.	.	.	.	.	.	.
EC717	4	.	.	99.24	.	.	.	.	.	.	.	.	100	.	.	100	.	.	99.6	.	.	.	.	.	.	.	.	.	.	.	.	.	.	.
